# Supplementary material for: Construction, Physical Properties and Foaming Behavior of High-Content Lignin Reinforced Low-Density Polyethylene Biocomposites
Source: MDPI journal article supplement (doi:10.3390/polym14132688), 2022-06-30
Supplement: s1 [file s1]

# Supplementary Materials: Construction, Physical Properties and Foaming Behavior of High-content Lignin Reinforced Low-density Polyethylene Biocomposites

Seo-Hwa Hong and Seok-Ho Hwang

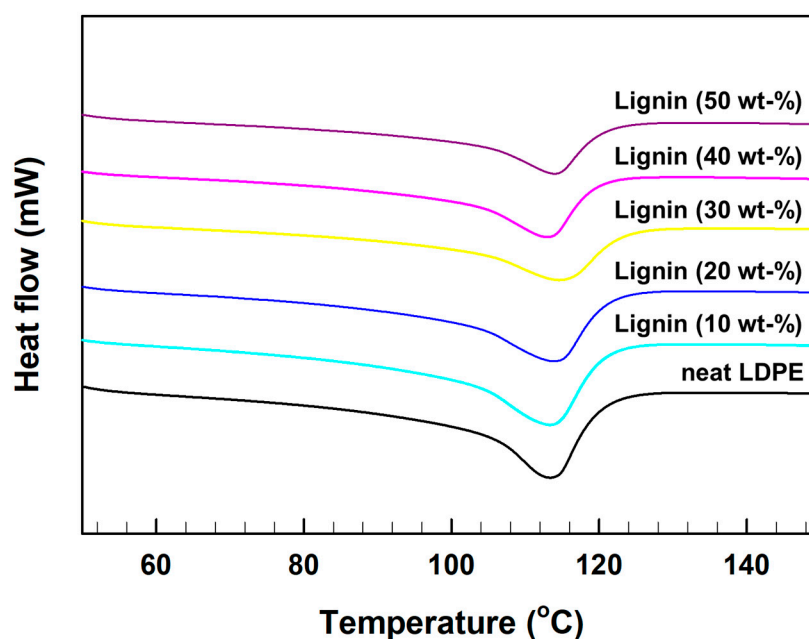

A

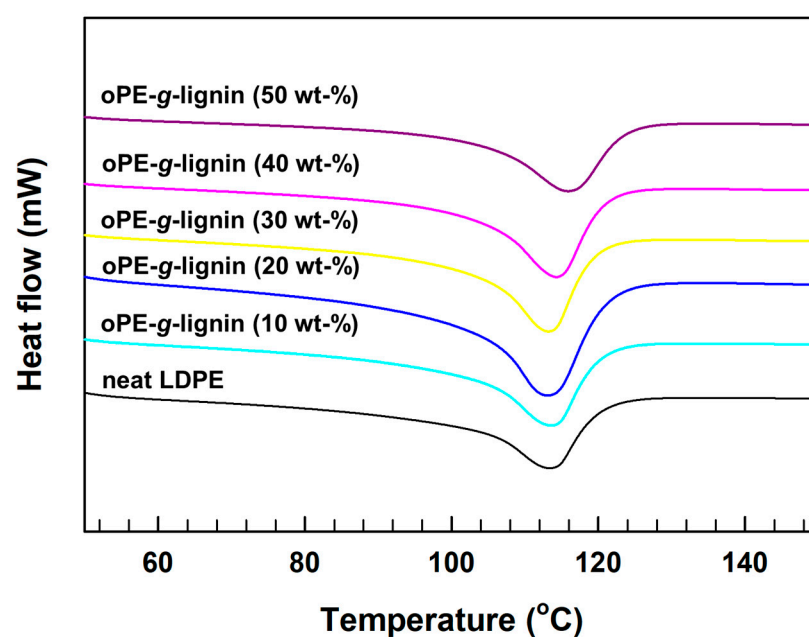

B

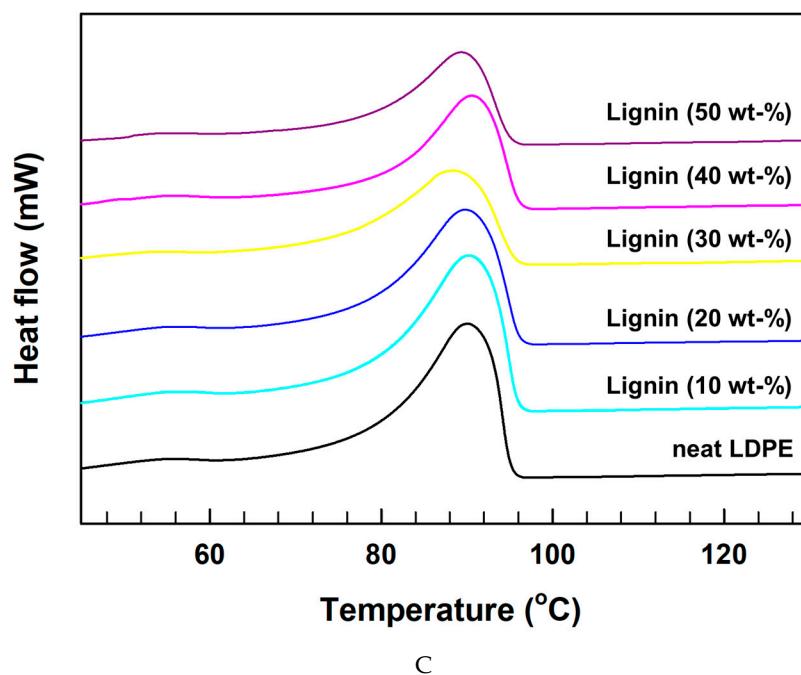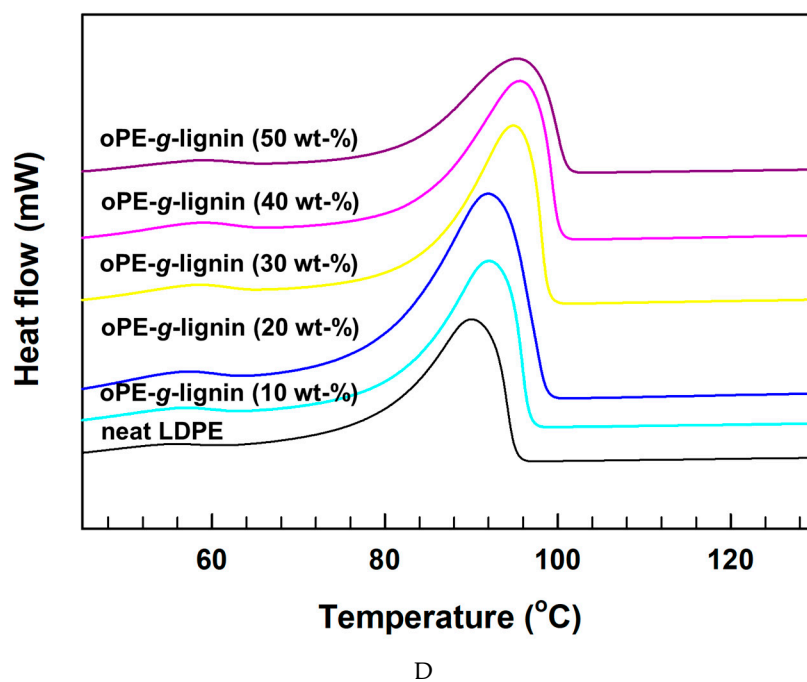

**Figure S1.** DSC thermograms: (A) heating curve for pristine lignin/LDPE biocomposites, (B) heating curve for oPE-g-lignin/LDPE biocomposite, (C) cooling curve for pristine lignin/LDPE biocomposites, (D) cooling curve for oPE-g-lignin/LDPE biocomposite.

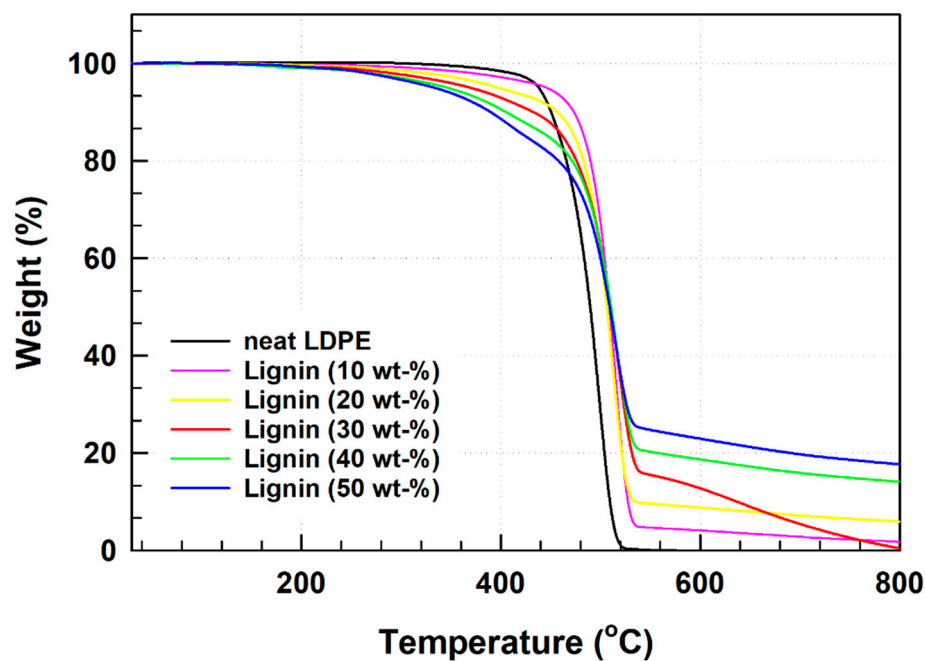

A

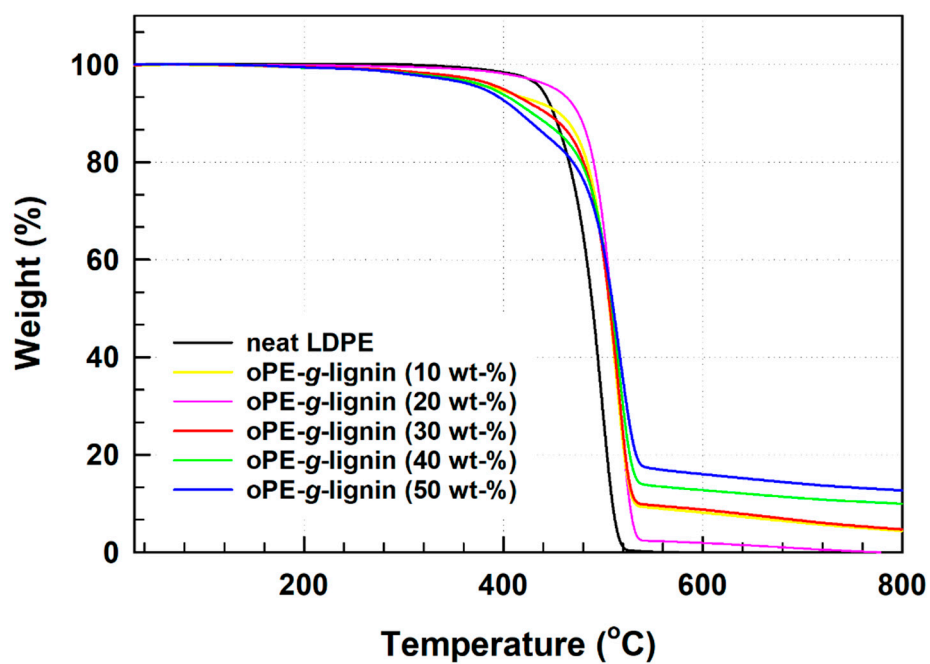

B

**Figure S2.** TGA thermograms for pristine lignin/LDPE biocomposites (A) and oPE-g-lignin/LDPE biocomposites (B).

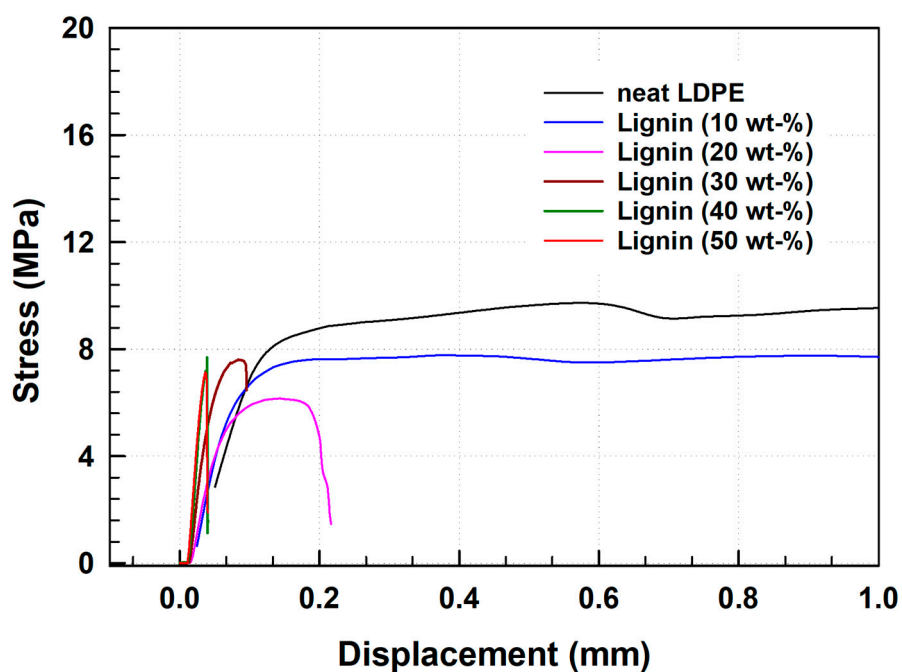

A

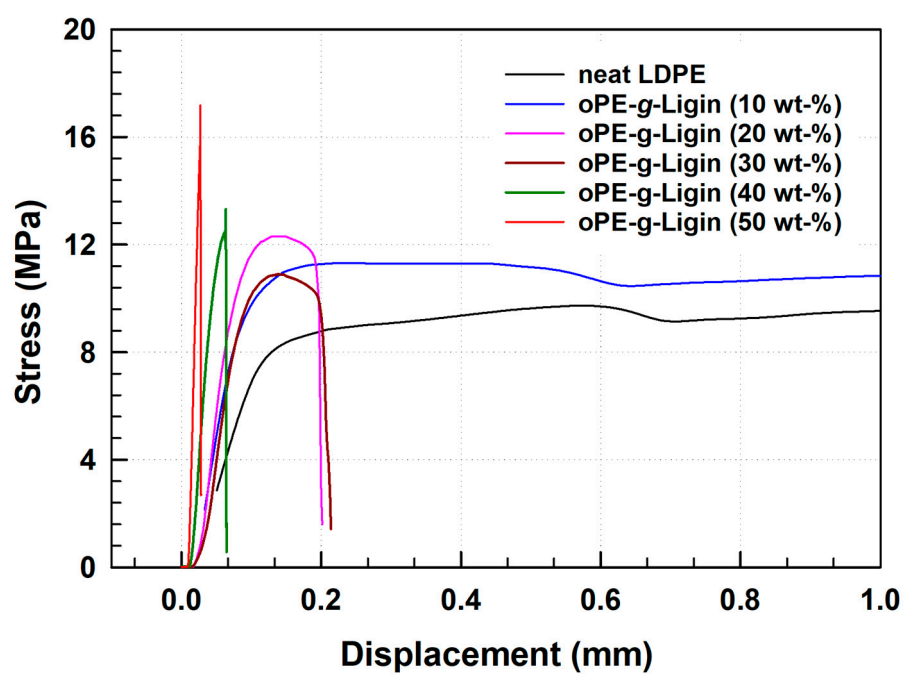

B

**Figure S3.** Stress-strain curves for pristine lignin/LDPE biocomposites (A) and oPE-g-lignin/LDPE biocomposites (B).
